# Supplementary material
Source: publisher figshare collection journal article supplement (https://sage.figshare.com/ndownloader/files/28353104)

**Supplement A**

**Table S1: Sample descriptives by community**

| **Community** | **Household *N* =507** | **Individual *N* = 633** | **IWI mean (std)** | **MPI-SL mean (std)** | **PPI mean (std)** | **AWE mean (std)** | **DHS mean (std)** | **Ln Total Wealth** | **Ladder ranking** | **Self-ranking** | **Community Ranking** |
| --- | --- | --- | --- | --- | --- | --- | --- | --- | --- | --- | --- |
| **Mandi Rural** | 32 | 39 | 32.78  (15.63) | 39.06  (16.73) | 58.41  (21.73) | 7.43  (0.58) | ˗0.33  (0.38) | 8.38  (2.06) | 4.69  (2.49) | 2.08 (0.48) | 1.88  (0.5) |
| **Hajong Rural** | 34 | 46 | 29.41  (13.09) | 34.80  (17.10) | 53.21  (20.03) | 7.26  (0.56) | ˗0.44  (0.3) | 7.48  (2.12) | 3.41  (2.16) | 2.13 (0.46) | 1.89  (0.56) |
| **Santal Rural** | 46 | 53 | 23.39  (13.71) | 35.14  (17.65) | 44.65  (14.24) | 7.01  (0.62) | ˗0.56  (0.33) | 7.32  (1.51) | 3.48  (1.76) | 2.18 (.47) | 1.87  (0.45) |
| **Muslim Bengali Rural 1** | 52 | 87 | 18.97  (8.94) | 25  (12.99) | 44.81  (13.79) | 6.80  (0.42) | ˗0.68  (0.23) | 6.88  (1.39) | 3.44  (2.26) | 2.28 (0.4) | 1.69  (0.37) |
| **Hindu Bengali Rural 1** | 53 | 80 | 20.37  (9.95) | 26.10  (13.28) | 47.32  (14.42) | 6.92  (0.419) | ˗0.54  (0.27) | 7.43  (1.03) | 3.98  (1.72) | 2.06 (0.43) | 1.96  (0.44) |
| **Muslim Bengali Rural 2** | 60 | 104 | 33.89  (13.81) | 48.89  (17.05) | 57.2  (19.03) | 7.56  (0.64) | ˗0.26  (0.47) | 7.97  (1.6) | 3.67  (1.95) | 2.08 (.47) | 1.87  (0.56) |
| **Hindu Bengali Rural 2** | 54 | 113 | 31.47  (15.66) | 45.68  (19.20) | 55.24  (16.66) | 7.42  (0.67) | ˗0.27  (0.46) | 7.7  (1.66) | 3.7  (1.6) | 2.24 (.44) | 1.72  (0.53) |
| **Char** | 38 | 45 | 14.42  (7.32) | 19.74  (7.61) | 35.13  (12.13) | 6.51  (0.3) | ˗0.73  (.09) | 5.04  (1.64) | 2.24  (1.26) | 2.04 (.27) | 1.98  (0.42) |
| **Dalit Peri Urban** | 39 | 49 | 20.96  (10.38) | 31.62  (15.2) | 37.26  (13.67) | 7.01  (0.49) | ˗0.54  (0.28) | 3.98  (1.84) | 2.51  (1.5) | 2.11 (.29) | 1.91  (0.46) |
| **Potters Peri Urban** | 10 | 17 | 35.05  (10.59) | 45  (13.72) | 52.9  (10.38) | 7.64  (0.51) | ˗0.31  (0.31) | 7.3  (1.7) | 2.10  (0.74) | 2.15 (.35) | 1.96  (0.31) |
| **City** | 89 | 0 | 52.41  (12.86) | 61.61  (14.52) | 63.76  (16.03) | 8.49  (0.75) | 0.36  (0.52) | 8.46  (1.56) |  |  |  |

**Table S2: Para-level correlations between outcomes and wealth indices**

|  |  | **Mandi Rural** | **Hajong Rural** | **Hindu Bengali Rural 1** | **Muslim Bengali Rural 1** | **Hindu Bengali Rural 2** | **Muslim Bengali Rural 2** | **Char** | **Santal Rural** | **Dalit Peri Urban** | **Potters Peri Urban** | **City** | **Total** |
| --- | --- | --- | --- | --- | --- | --- | --- | --- | --- | --- | --- | --- | --- |
| **Household**  ***N*=** | 32 | 34 | 53 | 52 | 54 | 60 | 38 | 46 | 39 | 10 | 89 | 507 |
| **Total**  **Wealth** | IWI | 0.44* | 0.59** | 0.21 | 0.40** | 0.54** | 0.65** | 0.33* | 0.30* | 0.23 | 0.02 | 0.52** | 0.55** |
| MPI-SL | 0.36* | 0.49** | 0.25 | 0.37** | 0.51** | 0.61** | 0.20 | 0.32* | 0.17 | 0.05 | 0.44** | 0.50** |
| PPI | 0.70** | 0.65** | 0.42** | 0.36** | 0.56** | 0.55** | 0.14 | 0.30* | 0.40* | 0.47 | 0.47** | 0.60** |
| AWE | 0.57** | 0.69** | 0.30* | 0.40** | 0.65** | 0.66** | 0.15 | 0.36* | 0.13 | 0.22 | 0.57** | 0.56** |
| DHS | 0.32 | 0.49** | 0.30* | 0.32* | 0.56** | 0.57** | ˗0.12 | 0.33* | 0.15 | 0.38 | 0.35** | 0.48** |
|  |  |  |  |  |  |  |  |  |  |  |  |  |  |
| **Ladder Ranking** | IWI | 0.53** | 0.41* | 0.27* | 0.23 | 0.36** | 0.43** | 0.10 | 0.52** | 0.25 | 0.08 |  | 0.38** |
| MPI-SL | 0.50** | 0.35* | 0.30* | 0.02 | 0.37** | 0.38** | 0.02 | 0.52** | 0.10 | 0.24 |  | 0.31** |
| PPI | 0.58** | 0.39* | 0.06 | 0.24 | 0.31* | 0.39** | ˗0.05 | 0.27 | ˗0.03 | 0.00 |  | 0.35** |
| AWE | 0.58** | 0.37* | 0.30* | 0.06 | 0.38** | 0.40** | 0.13 | 0.57** | 0.17 | 0.26 |  | 0.36** |
| DHS | 0.51** | 0.27 | 0.22 | 0.10 | 0.36** | 0.41** | 0.12 | 0.46** | 0.12 | 0.32 |  | 0.33** |
|  |  |  |  |  |  |  |  |  |  |  |  |  |  |
| **Individual**  ***N* =** | 39 | 46 | 80 | 87 | 113 | 104 | 45 | 53 | 49 | 17 |  | 633 |
| **Self**  **Ranking** | IWI | 0.68** | 0.66** | 0.33** | 0.27* | 0.64** | 0.66** | 0.53** | 0.57** | 0.21 | 0.18 |  | 0.45** |
| MPI-SL | 0.47** | 0.64** | 0.36** | 0.17 | 0.53** | 0.60** | 0.42** | 0.63** | 0.15 | 0.30 |  | 0.36** |
| PPI | 0.78** | 0.59** | 0.29** | 0.22* | 0.62** | 0.69** | ˗0.07 | 0.32* | ˗0.16 | ˗0.07 |  | 0.39** |
| AWE | 0.73** | 0.69** | 0.63** | 0.15 | 0.64** | 0.67** | 0.48** | 0.60** | 0.21 | 0.08 |  | 0.46** |
| DHS | 0.58** | 0.56** | 0.65** | 0.10 | 0.64** | 0.68** | 0.05 | 0.52** | 0.18 | 0.53* |  | 0.45** |
|  |  |  |  |  |  |  |  |  |  |  |  |  |  |
| **Community**  **Ranking** | IWI | 0.85** | 0.73** | 0.36** | 0.44** | 0.56** | 0.70** | 0.46** | 0.63** | .53** | 0.02 |  | 0.51** |
| MPI-SL | 0.62** | 0.62** | 0.42** | 0.39** | 0.49** | 0.63** | 0.38* | 0.63** | .54** | 0.30 |  | 0.44** |
| PPI | 0.77** | 0.71** | 0.43** | 0.18 | 0.50** | 0.68** | ˗0.02 | 0.39** | 0.12 | ˗0.18 |  | 0.43** |
| AWE | 0.83** | 0.76** | 0.63** | 0.37** | 0.56** | 0.71** | 0.42** | 0.58** | 0.49** | 0.03 |  | 0.50** |
| DHS | 0.70** | 0.67** | 0.65** | 0.22* | 0.53** | 0.68** | 0.23 | 0.42** | 0.46** | 0.62** |  | 0.46** |

**Table S3: Correlations between IWI, MPI-SL, PPI, AWE, and DHS (*n*[[*N* ?S This is the total number of households]] = 507)**

|  | **IWI** | **MPI-SL** | **PPI** | **AWE** |
| --- | --- | --- | --- | --- |
| **MPI-SL** | 0.89** |  |  |  |
| **PPI** | 0.66** | 0.62** |  |  |
| **AWE** | 0.93** | 0.87** | 0.68** |  |
| **DHS** | 0.86** | 0.81** | 0.64** | 0.90** |

** = significant at the 0.01 level

**Figure S1: Relationships between wealth measures, individual self and community rankings, and total household wealth.**


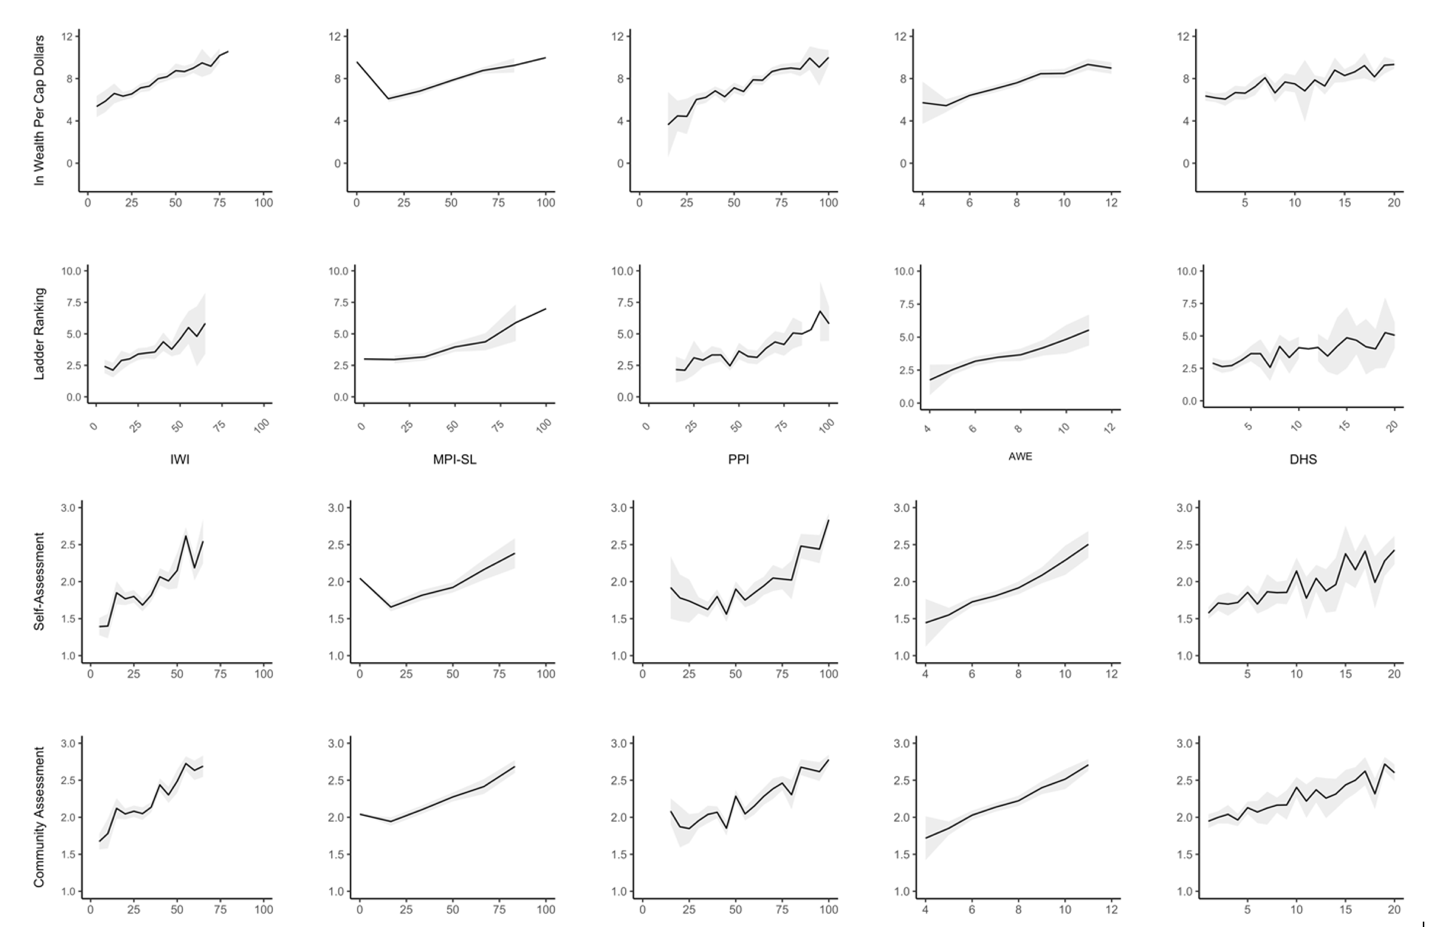


**Figure S2: Relationship between community-level wealth measures and total wealth and ladder ratings**


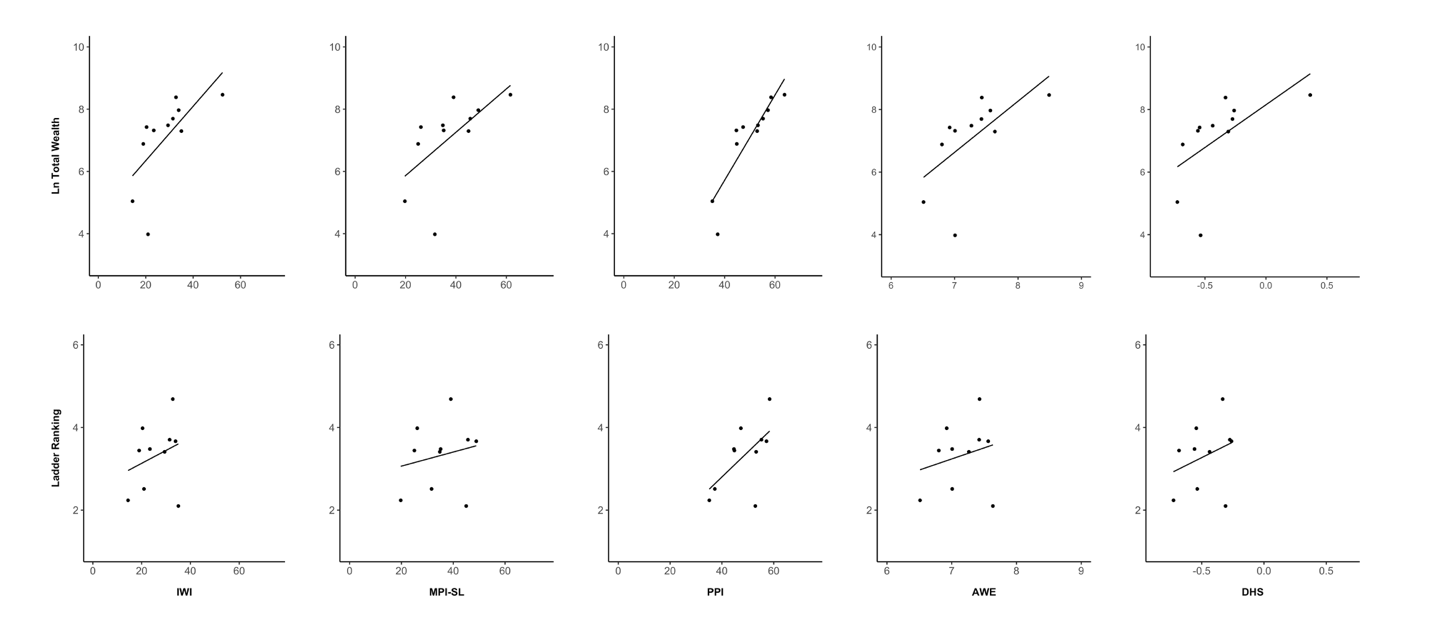

Supplement: Supplementary file 1 [file 28353104]
